# Supplementary material
Source: PubMed Central journal article supplement (PMC3100886)

## Supplementary figures

**Figure S1.** The *Drosophila* cardia structure. A is drawings (adapted from King, 1988) of the *Drosophila* GI system and cardia. Numbers 1-6 indicate epithelial zones in the cardia. Anterior is to the up in all panels.

**Figure S2.** Structural morphology and nuclei size in *Drosophila* cardia. (A-C') the cardia was stained with DAPI (Blue) to highlight the cardia structure and cell sizes. (A, A') 3<sup>rd</sup> instar larvae cardia. (B-C') Adult cardia. White arrows in A represent 4 gastric caeca. (B,B') inner section of cardia and C,C' outer section of cardia. D, point to the F/M junction. Anterior is to the up in all panels. Scale bars represent 10  $\mu$ m.

**Figure S3.** Markers and lineage analysis in cardia. (A) the cardia of *Stat92E-GFP* flies (outer view) was stained with anti-GFP (green) and Dapi (blue). (B) Patched (Ptc)-lacZ (red), Dapi (blue). (C) The cardia of a *dome-Gal4 UAS-GFP* fly was stained with anti-GFP (green) and DAPI (blue). White arrows point to the F/M junction. (D) The cardia of *wg-Gal4 UAS-GFP* flies (inner view) were stained with GFP (green) and Dapi (blue). (E) the cardia of *Stat92E-GFP* flies was stained with anti-GFP (green) and Apoptag kit (red) to detect dead cells. (F and F') Lineage-marking of random dividing cells at the F/M junction after 2 days of heat-shock FLP-catalyzed site-specific recombination. The cells were marked with anti- $\beta$ -gal (green) and anti-Odd (red) antibodies. (G-I) Flies with the genotype *UAS-Flp/+; Act5C-FRT-Draf-FRT-tau-lacZ/byn-Gal4 UAS-GFP; tub-GAL80<sup>ts</sup>/+* (G), or *UAS-Flp/+; Act5C-FRT-Draf-FRT-tau-lacZ/ppl-Gal4 UAS-GFP; tub-GAL80<sup>ts</sup>/+* (H), or *UAS-Flp/+; Act5C-FRT-Draf-FRT-tau-lacZ/esg-Gal4 UAS-GFP; tub-GAL80<sup>ts</sup>/+* (I) were cultured at the permissive temperature (18 °C) and then shifted to the restricted temperature (29°C) for 3 days. The cardia was stained with anti-GFP (green), anti- $\beta$ -gal (red), and DAPI (blue). Anterior is to the right in all panels. (J) flies stained with RFP (red), GFP (green), Ptc (pink) and Dapi (blue). Scale bars represent 10  $\mu$ m.

**Figure S4.** Hh signaling regulates GaSC differentiation. (A, C) fly with the genotype *Stat92E-GFP/+; Act-Gal4/+; tub-Gal80<sup>ts</sup>/UAS-Ci<sup>Cell</sup>* were cultured at the restricted temperature (29°C) for 4 days. The cardia was stained with GFP (green) anti-Odd (red) and DAPI (blue). (B) cardia of a wild type fly stained with Dapi (white). Scale bars represent 10  $\mu$ m.

A

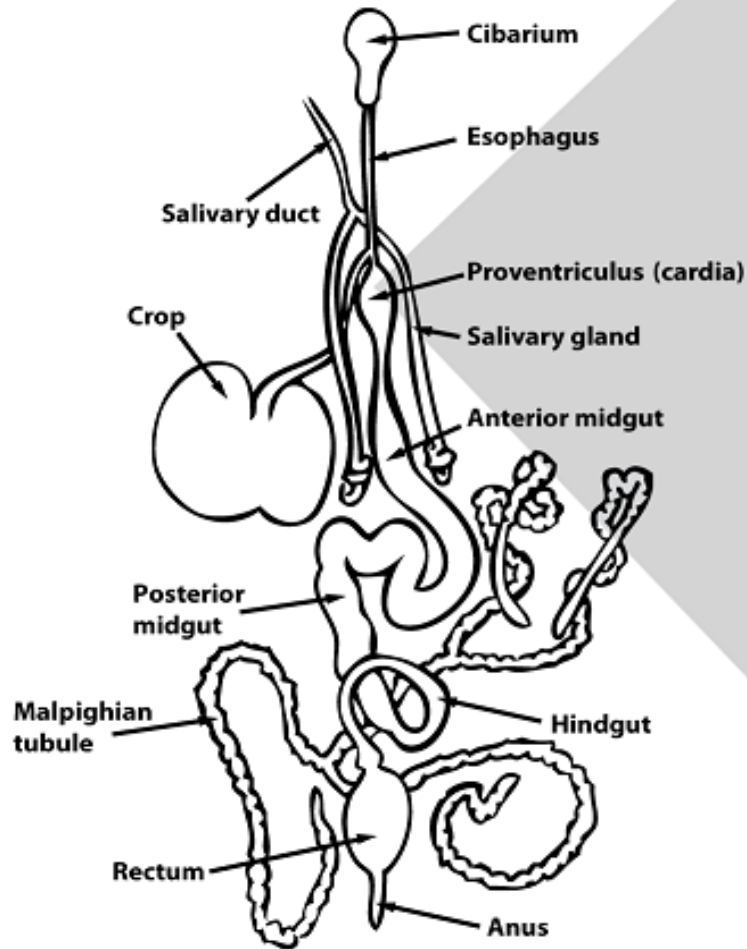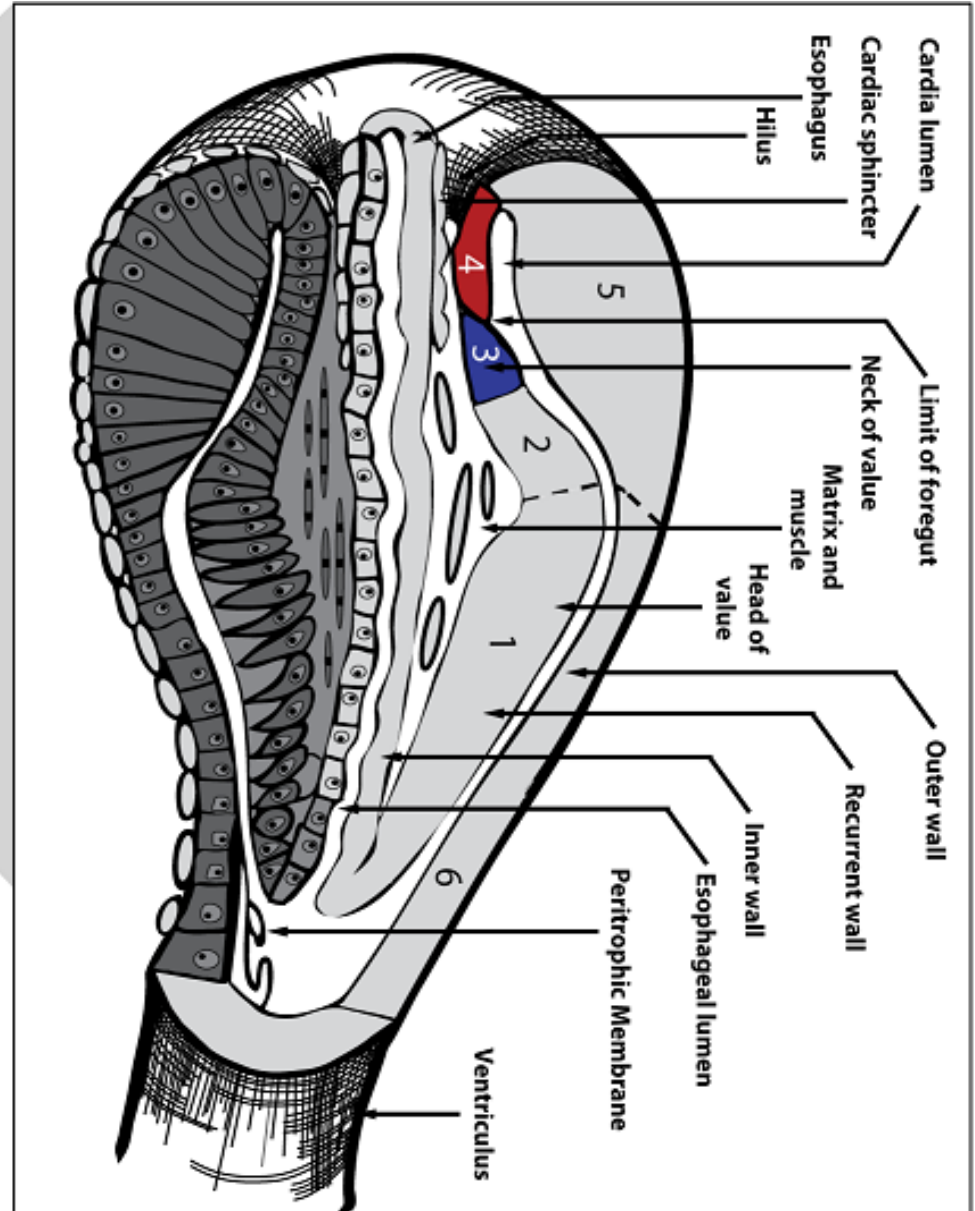

Singh et al. Supplementary Figure 2

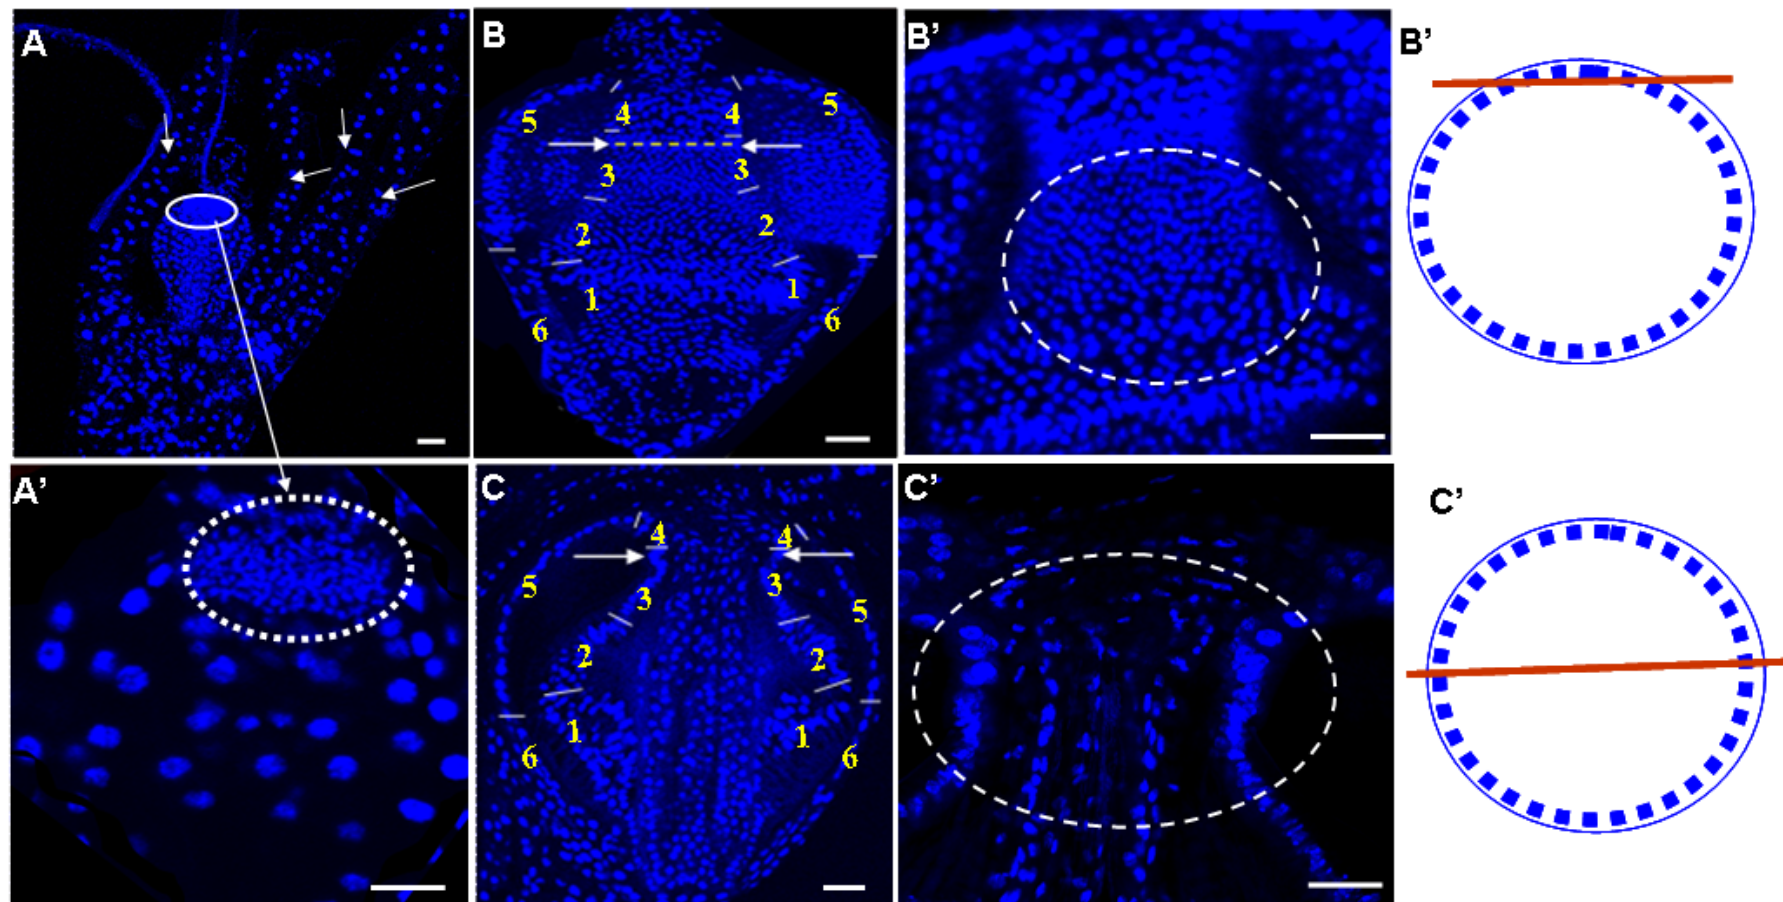

Singh et al. Supplementary Figure 3

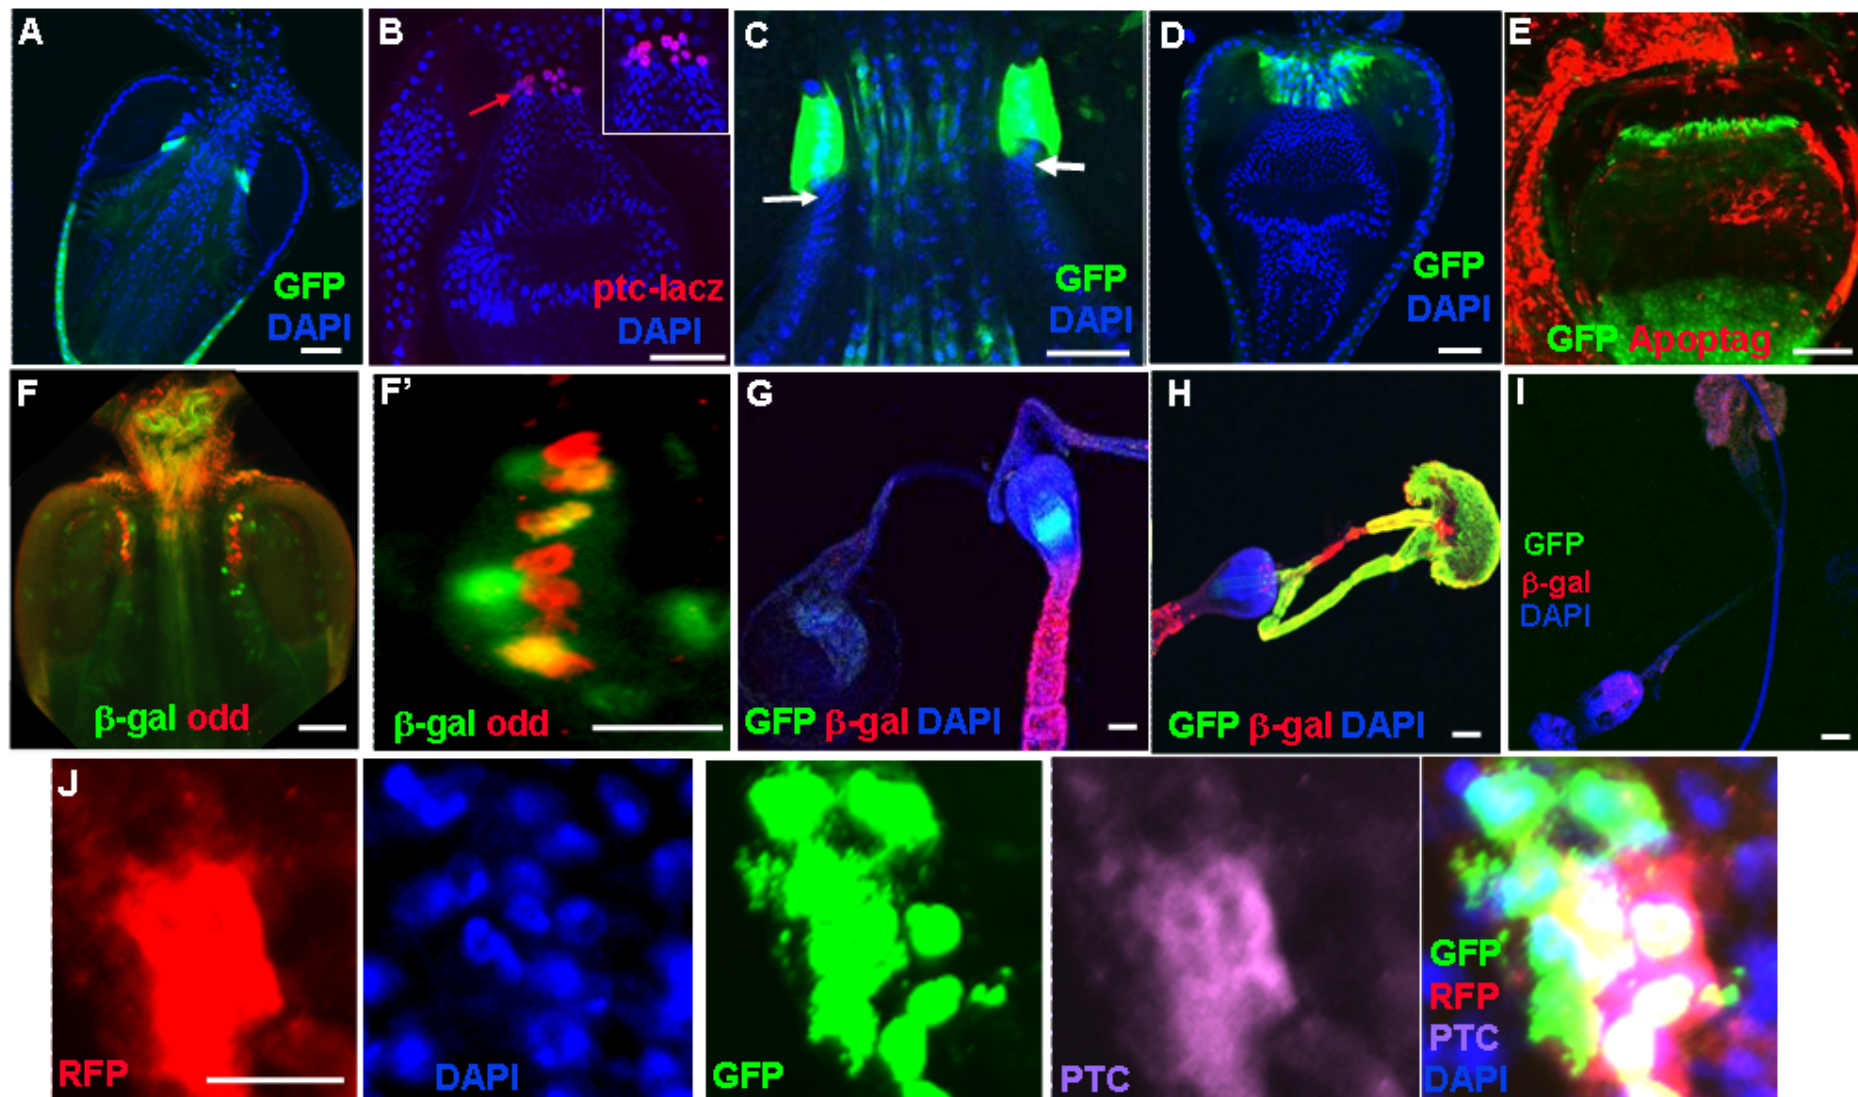

Singh et al. Supplementary Figure 4

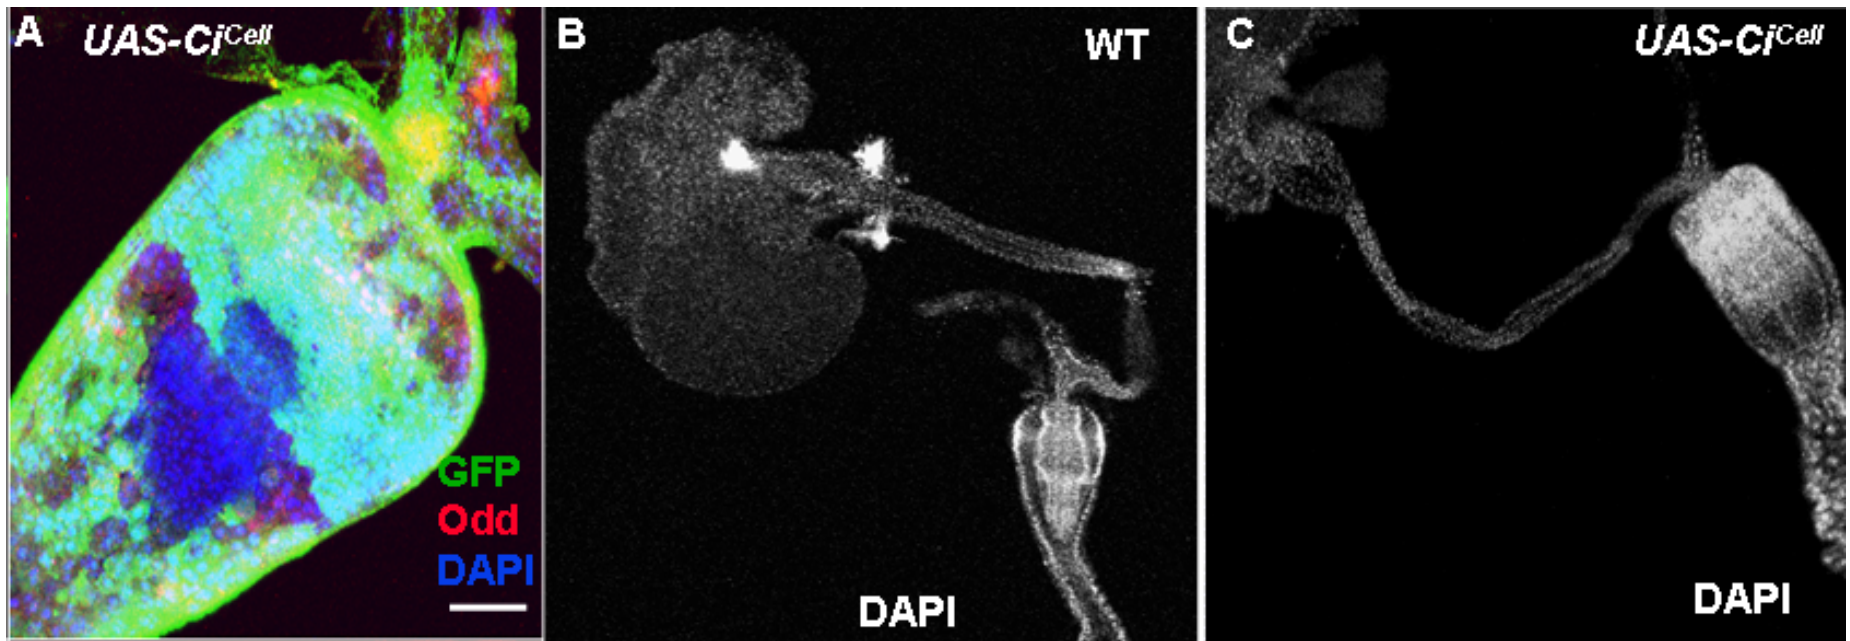

Supplement: cc1007_1109SD1.pdf [file cc1007_1109SD1.pdf]
